# Supplementary material for: Apathy and Depression in Huntington’s Disease: Distinct Longitudinal Trajectories and Clinical Correlates
Source: Atypon-hosted journal article supplement (doi:10.1176/appi.neuropsych.21070191), 2022-09-21
Supplement: appi.neuropsych.21070191.ds001.pdf [file appi.neuropsych.21070191.ds001.pdf]

## SUPPLEMENTARY MATERIAL

### Appendix 1: Supplementary Figure

Flow diagram indicating sample sizes across time points (patients diagnosed with Huntington disease on the basis of clinician confidence  $\geq 99\%$  in diagnosis according to UHDRS motor criteria and CAG counts greater than 35).

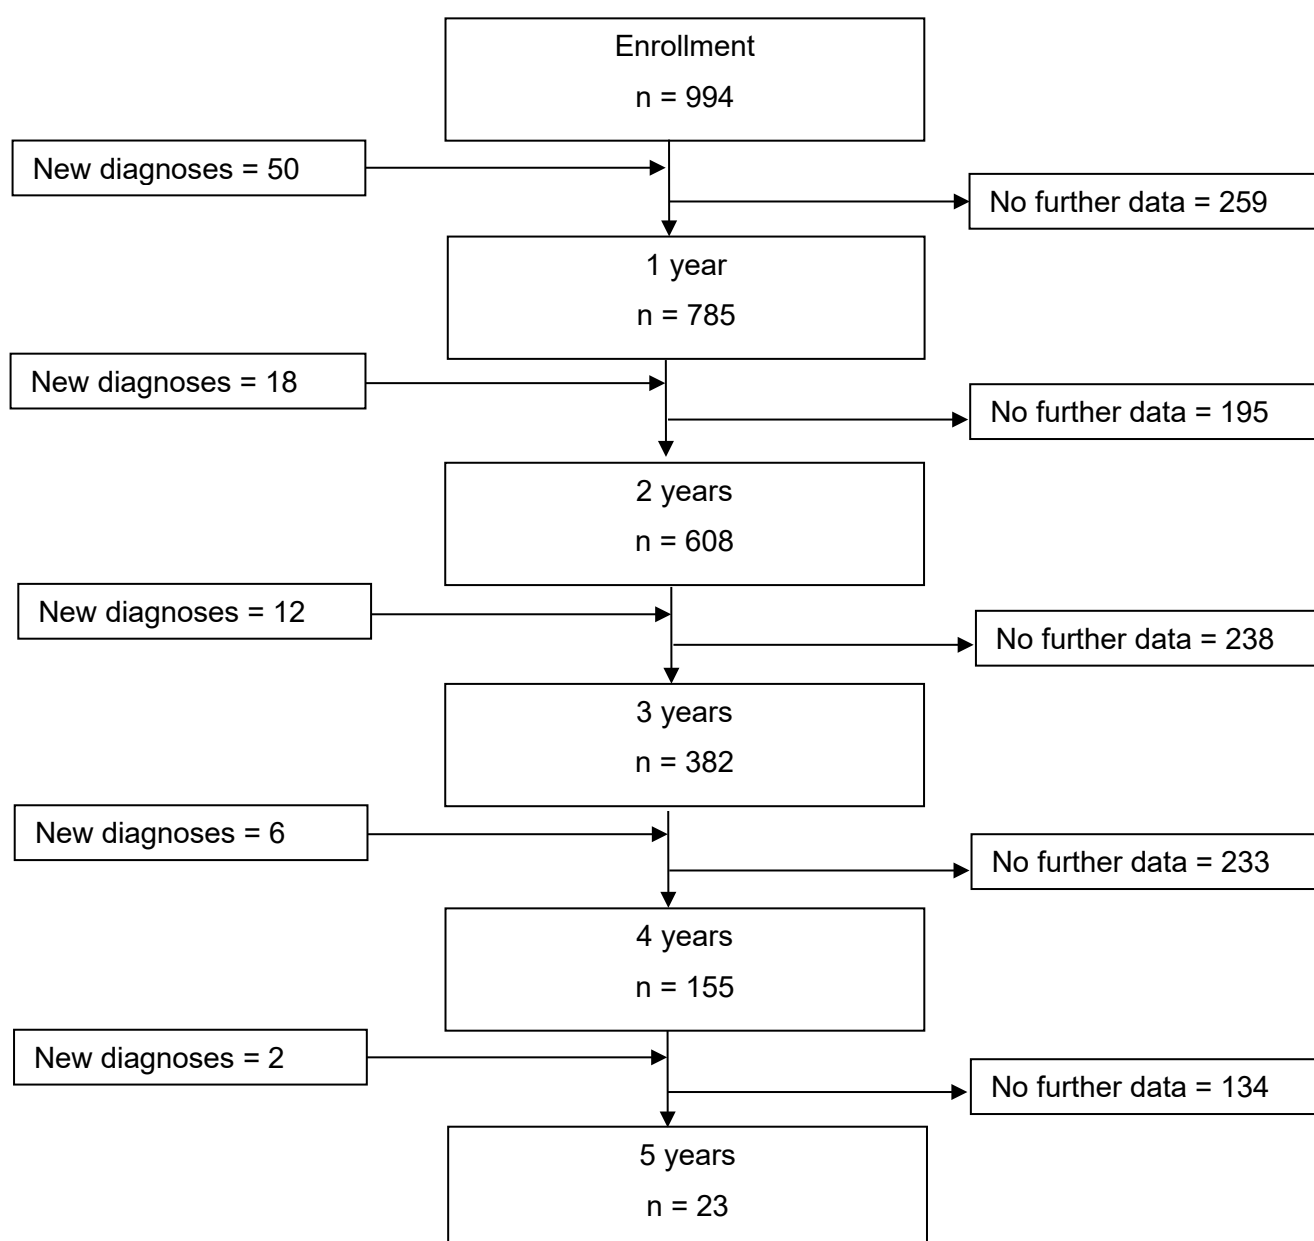

**Appendix 2: Trajectory of Apathy over Time**

**Table 1**

*Linear mixed model examining the trajectory of apathy over time*

| <b>Parameter</b>                                  | <b>Estimate</b> | <b>95% CI</b> | <b>Sig</b>        |
|---------------------------------------------------|-----------------|---------------|-------------------|
| <b>Apathy over time</b>                           |                 |               |                   |
| Intercept <sup>1</sup>                            | 3.33            | 0.06, 6.61    | 0.046             |
| Time effect <sup>2</sup>                          | 0.10            | 0.05, 0.14    | <b>&lt; 0.001</b> |
| CAG                                               | -0.03           | -0.08, 0.03   | 0.325             |
| Age                                               | -0.01           | -0.03, 0.01   | 0.328             |
| Sex (female)                                      | 0.09            | -0.24, 0.41   | 0.593             |
| <b>Controlling for depression and medications</b> |                 |               |                   |
| Intercept <sup>3</sup>                            | 1.36            | -2.00, 4.72   | 0.427             |
| Time effect <sup>4</sup>                          | 0.07            | 0.03, 0.11    | <b>0.002</b>      |
| CAG                                               | -0.01           | -0.07, 0.05   | 0.710             |
| Age                                               | 0.00            | -0.02, 0.02   | 0.873             |
| Sex (female)                                      | -0.28           | -0.61, 0.04   | 0.086             |
| Depression                                        | 0.42            | 0.37, 0.46    | <b>&lt; 0.001</b> |
| Antidepressant                                    | 0.33            | 0.03, 0.64    | <b>0.034</b>      |
| Stimulant                                         | -0.31           | -1.42, 0.79   | 0.580             |
| Antipsychotic                                     | 0.84            | 0.51, 1.17    | <b>&lt; 0.001</b> |

*Note.* Apathy and depression were measured using the Unified Huntington Disease Rating Scale (UHDRS). Numbers in bold indicate p-values < 0.05.

<sup>1</sup>Random effect with mean 3.33 and SD = 1.71

<sup>2</sup>Random effect with mean 0.10 and SD = 0.17

<sup>3</sup>Random effect with mean 1.36 and SD = 1.34

<sup>4</sup>Random effect with mean 0.07 and SD = 0.17

**Table 2**

*Linear mixed model examining the trajectory of depression*

| Parameter                                     | Estimate | 95% CI       | Sig               |
|-----------------------------------------------|----------|--------------|-------------------|
| <b>Depression over time</b>                   |          |              |                   |
| Intercept <sup>1</sup>                        | 6.23     | 3.51, 8.95   | <b>&lt; 0.001</b> |
| Time effect <sup>2</sup>                      | -0.01    | -0.04, 0.02  | 0.610             |
| CAG                                           | -0.07    | -0.12, -0.03 | <b>0.002</b>      |
| Age                                           | -0.03    | -0.05, -0.01 | <b>&lt; 0.001</b> |
| Sex (female)                                  | 0.64     | 0.38, 0.91   | <b>&lt; 0.001</b> |
| <b>Controlling for apathy and medications</b> |          |              |                   |
| Intercept <sup>3</sup>                        | 4.98     | 2.20, 7.76   | <b>&lt; 0.001</b> |
| Time effect <sup>4</sup>                      | -0.04    | -0.07, 0.00  | <b>0.029</b>      |
| CAG                                           | -0.06    | -0.11, -0.01 | <b>0.015</b>      |
| Age                                           | -0.03    | -0.04, -0.01 | <b>0.001</b>      |
| Sex (female)                                  | 0.65     | 0.38, 0.91   | <b>&lt; 0.001</b> |
| Apathy                                        | 0.26     | 0.23, 0.28   | <b>&lt; 0.001</b> |
| Antidepressant                                | 0.29     | 0.05, 0.54   | <b>0.019</b>      |
| Stimulant                                     | 0.31     | -0.54, 1.17  | 0.471             |
| Antipsychotic                                 | -0.12    | -0.38, 0.15  | 0.385             |

*Note.* Apathy and depression were measured using the Unified Huntington Disease Rating Scale (UHDRS). Numbers in bold indicate p-values < 0.05.

<sup>1</sup>Random effect with mean 6.23 and SD = 1.67

<sup>2</sup>Random effect with mean -0.01 and SD = 0.00

<sup>3</sup>Random effect with mean 4.98 and SD = 1.39

<sup>4</sup>Random effect with mean -0.04 and SD = 0.05

**Appendix 3: Trajectory of Apathy over Time****Table 1***Unadjusted mean scores of apathy and depression across the first four years of the study*

|                 | <b>Apathy</b> | <b>Depression</b> |
|-----------------|---------------|-------------------|
| <b>Baseline</b> | 1.96 (3.45)   | 1.71 (2.95)       |
| <b>1 year</b>   | 2.18 (3.67)   | 1.62 (2.88)       |
| <b>2 years</b>  | 1.99 (3.36)   | 1.49 (2.61)       |
| <b>3 years</b>  | 2.50 (3.86)   | 1.75 (2.87)       |
| <b>4 years</b>  | 2.71 (4.05)   | 1.56 (2.66)       |

*Note.* Apathy and depression were measured using the Unified Huntington Disease Rating Scale (UHDRS). Characteristics are summarized as means (standard deviations). Analyses focused on the first four years of the study due to the small number of participants returning thereafter (see main text).

**Appendix 4: Subdomain Outcomes**

**Table 1**

*Linear mixed models for cognitive tests other than the Mini-Mental State Examination*

| <b>Parameter</b>                    | <b>Estimate</b> | <b>95% CI</b>  | <b>Sig</b> |
|-------------------------------------|-----------------|----------------|------------|
| <b>Symbol Digit Modalities Test</b> |                 |                |            |
| Intercept <sup>1</sup>              | 133.13          | 118.63, 147.62 | < 0.001    |
| Time effect <sup>2</sup>            | -1.32           | -1.45, -1.18   | < 0.001    |
| Apathy                              | -0.13           | -0.21, -0.05   | 0.001      |
| Depression                          | -0.05           | -0.15, 0.04    | 0.265      |
| CAG                                 | -1.75           | -2.00, -1.50   | < 0.001    |
| Age                                 | -0.53           | -0.61, -0.45   | < 0.001    |
| Sex (female)                        | 0.30            | -0.97, 1.57    | 0.647      |
| <b>Verbal Fluency</b>               |                 |                |            |
| Intercept <sup>3</sup>              | 117.40          | 100.91, 133.90 | < 0.001    |
| Time effect <sup>4</sup>            | -0.62           | -0.76, -0.48   | < 0.001    |
| Apathy                              | -0.18           | -0.27, -0.09   | < 0.001    |
| Depression                          | 0.12            | 0.01, 0.23     | 0.026      |
| CAG                                 | -1.64           | -1.93, -1.36   | < 0.001    |
| Age                                 | -0.39           | -0.48, -0.30   | < 0.001    |
| Sex (female)                        | 0.21            | -1.25, 1.66    | 0.780      |
| <b>Stroop Interference Test</b>     |                 |                |            |
| Intercept <sup>5</sup>              | 103.44          | 89.30, 117.58  | < 0.001    |
| Time effect <sup>6</sup>            | -0.97           | -1.12, -0.83   | < 0.001    |
| Apathy                              | -0.39           | -0.54, -0.25   | < 0.001    |
| Apathy*Time                         | 0.03            | 0.01, 0.05     | 0.003      |
| Depression                          | -0.04           | -0.15, 0.07    | 0.457      |
| CAG                                 | -1.11           | -1.36, -0.87   | < 0.001    |

|              |       |              |                   |
|--------------|-------|--------------|-------------------|
| Age          | -0.48 | -0.56, -0.40 | <b>&lt; 0.001</b> |
| Sex (female) | 0.30  | -0.95, 1.55  | 0.642             |

---

*Note.* Apathy and depression were measured using the Unified Huntington Disease Rating Scale (UHDRS). Numbers in bold indicate p-values < 0.05.

<sup>1</sup> *Random effect with mean 133.13 and SD = 9.03*

<sup>2</sup> *Random effect with mean -1.32 and SD = 0.75*

<sup>3</sup> *Random effect with mean 117.40 and SD = 10.90*

<sup>4</sup> *Random effect with mean -0.62 and SD = 0.59*

<sup>5</sup> *Random effect with mean 103.44 and SD = 8.99*

<sup>6</sup> *Random effect with mean -0.97 and SD = 0.58*

**Table 2**

*Linear mixed models for occupational functioning, suicidal ideation, and psychosis*

| <b>Parameter</b>                | <b>Estimate</b> | <b>95% CI</b> | <b>Sig</b> |
|---------------------------------|-----------------|---------------|------------|
| <b>Occupational Functioning</b> |                 |               |            |
| Intercept <sup>1</sup>          | 5.17            | 4.16, 6.18    | < 0.001    |
| Time effect <sup>2</sup>        | -0.10           | -0.11, -0.09  | < 0.001    |
| Apathy                          | -0.03           | -0.05, -0.02  | < 0.001    |
| Apathy*Time                     | 0.00            | 0.00, 0.00    | < 0.001    |
| Depression                      | -0.01           | -0.02, 0.01   | 0.321      |
| CAG                             | -0.06           | -0.08, -0.05  | < 0.001    |
| Age                             | -0.02           | -0.02, -0.01  | < 0.001    |
| Sex (female)                    | -0.08           | -0.18, 0.02   | 0.097      |
| <b>Suicidal Ideation</b>        |                 |               |            |
| Intercept <sup>3</sup>          | -0.75           | -1.73, 0.24   | 0.138      |
| Time effect <sup>4</sup>        | -0.01           | -0.02, 0.00   | 0.154      |
| Apathy                          | 0.01            | -0.01, 0.02   | 0.326      |
| Depression                      | 0.09            | 0.08, 0.11    | < 0.001    |
| Independence                    | 0.00            | 0.00, 0.00    | 0.784      |
| Cognition                       | -0.01           | -0.02, 0.00   | 0.303      |
| Motor                           | 0.00            | 0.00, 0.00    | 0.284      |
| CAG                             | 0.02            | 0.00, 0.03    | 0.054      |
| Age                             | 0.00            | 0.00, 0.01    | 0.523      |
| Sex (female)                    | -0.02           | -0.09, 0.05   | 0.559      |
| Antidepressant                  | 0.05            | -0.02, 0.13   | 0.148      |
| <b>Psychosis</b>                |                 |               |            |
| Intercept <sup>5</sup>          | -1.42           | -3.22, 0.38   | 0.123      |
| Time effect <sup>6</sup>        | -0.02           | -0.04, 0.01   | 0.193      |

|               |       |             |                   |
|---------------|-------|-------------|-------------------|
| Apathy        | 0.02  | 0.00, 0.04  | <b>0.026</b>      |
| Depression    | 0.05  | 0.03, 0.08  | <b>&lt; 0.001</b> |
| CAG           | 0.03  | -0.01, 0.06 | 0.107             |
| Age           | 0.01  | 0.00, 0.02  | 0.173             |
| Sex (female)  | -0.01 | -0.19, 0.17 | 0.927             |
| Antipsychotic | 0.54  | 0.37, 0.72  | <b>&lt; 0.001</b> |

---

*Note.* Independence, occupational functioning, and neuropsychiatric symptoms were measured using the Unified Huntington Disease Rating Scale (UHDRS). Psychosis was calculated as the sum of the total scores of delusions and hallucinations within the UHDRS. Numbers in bold indicate p-values < 0.05.

<sup>1</sup>Random effect with mean 5.17 and SD = 0.74

<sup>2</sup>Random effect with mean -0.10 and SD = 0.01

<sup>3</sup>Random effect with mean -0.75 and SD = 0.17

<sup>4</sup>Random effect with mean -0.01 and SD = 0.00

<sup>5</sup>Random effect with mean -1.42 and SD = 0.15

<sup>6</sup>Random effect with mean -0.02 and SD = 0.00



**Table 3**

*Linear mixed models for measures of individual motor symptoms*

| <b>Parameter</b>         | <b>Estimate</b> | <b>95% CI</b>  | <b>Sig</b>        |
|--------------------------|-----------------|----------------|-------------------|
| <b>Chorea</b>            |                 |                |                   |
| Intercept <sup>1</sup>   | -2.75           | -8.18, 2.67    | 0.319             |
| Time effect <sup>2</sup> | 0.20            | 0.14, 0.27     | <b>&lt; 0.001</b> |
| Apathy                   | -0.02           | -0.07, 0.02    | 0.294             |
| Depression               | 0.01            | -0.04, 0.07    | 0.670             |
| CAG                      | 0.16            | 0.07, 0.25     | <b>0.001</b>      |
| Age                      | 0.10            | 0.06, 0.13     | <b>&lt; 0.001</b> |
| Sex (female)             | 0.01            | -0.53, 0.55    | 0.979             |
| Antipsychotic            | 0.01            | -0.43, 0.46    | 0.953             |
| Tetrabenazine            | 0.38            | -0.35, 1.11    | 0.305             |
| <b>Dystonia</b>          |                 |                |                   |
| Intercept <sup>3</sup>   | -15.43          | -19.14, -11.71 | <b>&lt; 0.001</b> |
| Time effect <sup>4</sup> | 0.30            | 0.24, 0.35     | <b>&lt; 0.001</b> |
| Apathy                   | 0.02            | -0.01, 0.05    | 0.274             |
| Depression               | 0.01            | -0.03, 0.05    | 0.525             |
| CAG                      | 0.32            | 0.25, 0.38     | <b>&lt; 0.001</b> |
| Age                      | 0.07            | 0.05, 0.09     | <b>&lt; 0.001</b> |
| Sex (female)             | -0.03           | -0.40, 0.34    | 0.870             |
| Antipsychotic            | 0.53            | 0.22, 0.85     | <b>0.001</b>      |
| Tetrabenazine            | -0.32           | -0.85, 0.21    | 0.243             |
| <b>Rigidity</b>          |                 |                |                   |
| Intercept <sup>5</sup>   | -5.48           | -7.04, -3.93   | <b>&lt; 0.001</b> |
| Time effect <sup>6</sup> | 0.10            | 0.08, 0.12     | <b>&lt; 0.001</b> |
| Apathy                   | 0.02            | 0.00, 0.03     | <b>0.032</b>      |

|                           |        |                |                   |
|---------------------------|--------|----------------|-------------------|
| Depression                | 0.01   | -0.01, 0.03    | 0.391             |
| CAG                       | 0.12   | 0.10, 0.15     | <b>&lt; 0.001</b> |
| Age                       | 0.02   | 0.01, 0.03     | <b>&lt; 0.001</b> |
| Sex (female)              | -0.17  | -0.32, -0.01   | <b>0.035</b>      |
| Antipsychotic             | 0.16   | 0.03, 0.30     | <b>0.020</b>      |
| Tetrabenazine             | 0.01   | -0.22, 0.24    | 0.930             |
| <b>Balance</b>            |        |                |                   |
| Intercept <sup>7</sup>    | -16.32 | -18.88, -13.77 | <b>&lt; 0.001</b> |
| Time effect <sup>8</sup>  | 0.32   | 0.29, 0.35     | <b>&lt; 0.001</b> |
| Apathy                    | 0.03   | 0.01, 0.05     | <b>0.004</b>      |
| Depression                | 0.02   | 0.00, 0.05     | <b>0.042</b>      |
| CAG                       | 0.29   | 0.24, 0.33     | <b>&lt; 0.001</b> |
| Age                       | 0.11   | 0.09, 0.12     | <b>&lt; 0.001</b> |
| Sex (female)              | 0.85   | 0.59, 1.11     | <b>&lt; 0.001</b> |
| Antipsychotic             | 0.64   | 0.44, 0.83     | <b>&lt; 0.001</b> |
| Tetrabenazine             | 0.58   | 0.26, 0.90     | <b>&lt; 0.001</b> |
| <b>Bradykinesia</b>       |        |                |                   |
| Intercept <sup>9</sup>    | -4.78  | -5.84, -3.72   | <b>&lt; 0.001</b> |
| Time effect <sup>10</sup> | 0.09   | 0.08, 0.10     | <b>&lt; 0.001</b> |
| Apathy                    | 0.02   | 0.01, 0.02     | <b>0.001</b>      |
| Depression                | 0.01   | 0.00, 0.02     | 0.182             |
| CAG                       | 0.10   | 0.08, 0.12     | <b>&lt; 0.001</b> |
| Age                       | 0.02   | 0.01, 0.03     | <b>&lt; 0.001</b> |
| Sex (female)              | -0.02  | -0.13, 0.08    | 0.668             |
| Antipsychotic             | 0.27   | 0.18, 0.36     | <b>&lt; 0.001</b> |
| Tetrabenazine             | 0.13   | -0.01, 0.28    | 0.076             |

*Note.* Movement disturbances and neuropsychiatric symptoms were measured using the Unified Huntington Disease Rating Scale (UHDRS). Numbers in bold indicate p-values < 0.05.

<sup>1</sup>Random effect with mean -2.75 and SD = 3.70

<sup>2</sup>Random effect with mean 0.20 and SD = 0.26

<sup>3</sup>Random effect with mean -15.43 and SD = 2.21

<sup>4</sup>Random effect with mean 0.30 and SD = 0.32

<sup>5</sup>Random effect with mean -5.48 and SD = 0.93

<sup>6</sup>Random effect with mean 0.10 and SD = 0.11

<sup>7</sup>Random effect with mean -16.32 and SD = 1.74

<sup>8</sup>Random effect with mean 0.32 and SD = 0.17

<sup>9</sup>Random effect with mean -4.78 and SD = 0.69

<sup>10</sup>Random effect with mean 0.09 and SD = 0.06

**Appendix 5: Apathy as Dichotomous Trait**

**Table 1**

*Linear mixed models for measures of function*

| <b>Parameter</b>                        | <b>Estimate</b> | <b>95% CI</b>  | <b>Sig</b>        |
|-----------------------------------------|-----------------|----------------|-------------------|
| <b>Independence Scale</b>               |                 |                |                   |
| Intercept <sup>1</sup>                  | 170.75          | 155.29, 186.22 | <b>&lt; 0.001</b> |
| Time effect <sup>2</sup>                | -2.38           | -2.56, -2.19   | <b>&lt; 0.001</b> |
| Apathy                                  | -4.03           | -4.97, -3.08   | <b>&lt; 0.001</b> |
| Depression                              | -0.57           | -1.61, 0.47    | 0.281             |
| CAG                                     | -1.33           | -1.59, -1.07   | <b>&lt; 0.001</b> |
| Age                                     | -0.38           | -0.47, -0.29   | <b>&lt; 0.001</b> |
| Sex (female)                            | -2.61           | -4.15, -1.06   | <b>0.001</b>      |
| <b>Total Functional Capacity</b>        |                 |                |                   |
| Intercept <sup>3</sup>                  | 27.09           | 23.72, 30.46   | <b>&lt; 0.001</b> |
| Time effect for apathy <sup>*4</sup>    | -0.43           | -0.47, -0.39   | <b>&lt; 0.001</b> |
| Time effect for no apathy <sup>*5</sup> | -0.49           | -0.53, -0.45   | <b>&lt; 0.001</b> |
| Apathy at time of diagnosis             | -0.98           | -1.26, -0.69   | <b>&lt; 0.001</b> |
| Depression                              | -0.03           | -0.24, 0.19    | 0.816             |
| CAG                                     | -0.28           | -0.34, -0.22   | <b>&lt; 0.001</b> |
| Age                                     | -0.08           | -0.10, -0.06   | <b>&lt; 0.001</b> |
| Sex (female)                            | -0.60           | -0.94, -0.27   | <b>&lt; 0.001</b> |

*Note.* Function and neuropsychiatric symptoms were measured using the Unified Huntington Disease Rating Scale (UHDRS). Numbers in bold indicate p-values < 0.05.

\*Interaction significant at p = 0.06. Separate time effects reported for different values of categorical variable.

<sup>1</sup>Random effect with mean 170.75 and SD = 10.46

<sup>2</sup>Random effect with mean -2.38 and SD = 1.28

<sup>3</sup>Random effect with mean 27.09 and SD = 2.41

<sup>4</sup>Random effect with mean -0.43 and SD = 0.22

<sup>5</sup>Random effect with mean -0.49 and SD = 0.22

**Table 2**

*Linear mixed models for measures of cognition*

| <b>Parameter</b>                        | <b>Estimate</b> | <b>95% CI</b>  | <b>Sig</b>   |
|-----------------------------------------|-----------------|----------------|--------------|
| <b>Mini-Mental State Examination</b>    |                 |                |              |
| Intercept <sup>1</sup>                  | 46.15           | 41.58, 50.72   | < 0.001      |
| Time effect for apathy <sup>*2</sup>    | -0.44           | -0.51, -0.37   | < 0.001      |
| Time effect for no apathy <sup>*3</sup> | -0.38           | -0.45, -0.30   | < 0.001      |
| Apathy at time of diagnosis             | -0.38           | -0.83, 0.08    | 0.108        |
| Depression                              | -0.06           | -0.40, 0.29    | 0.741        |
| CAG                                     | -0.33           | -0.41, -0.25   | < 0.001      |
| Age                                     | -0.09           | -0.12, -0.06   | < 0.001      |
| Sex (female)                            | -0.41           | -0.86, 0.04    | 0.073        |
| <b>Symbol Digit Modalities Test</b>     |                 |                |              |
| Intercept <sup>4</sup>                  | 135.82          | 121.20, 150.44 | < 0.001      |
| Time effect <sup>5</sup>                | -1.21           | -1.35, -1.07   | < 0.001      |
| Apathy                                  | -1.64           | -2.36, -0.92   | < 0.001      |
| Depression                              | -0.30           | -1.09, 0.50    | 0.469        |
| CAG                                     | -1.79           | -2.04, -1.53   | < 0.001      |
| Age                                     | -0.54           | -0.62, -0.46   | < 0.001      |
| Sex (female)                            | 0.33            | -0.94, 1.59    | 0.615        |
| <b>Verbal Fluency</b>                   |                 |                |              |
| Intercept <sup>6</sup>                  | 118.09          | 101.39, 134.78 | < 0.001      |
| Time effect <sup>7</sup>                | -0.60           | -0.75, -0.45   | < 0.001      |
| Apathy                                  | -1.17           | -2.00, -0.34   | <b>0.006</b> |
| Depression                              | 0.56            | -0.37, 1.48    | 0.237        |
| CAG                                     | -1.65           | -1.94, -1.36   | < 0.001      |
| Age                                     | -0.40           | -0.49, -0.30   | < 0.001      |

|                                 |        |               |                   |
|---------------------------------|--------|---------------|-------------------|
| Sex (female)                    | 0.25   | -1.21, 1.70   | 0.741             |
| <b>Stroop Interference Test</b> |        |               |                   |
| Intercept <sup>8</sup>          | 106.02 | 91.63, 120.41 | <b>&lt; 0.001</b> |
| Time effect <sup>9</sup>        | -0.83  | -0.97, -0.68  | <b>&lt; 0.001</b> |
| Apathy                          | -1.60  | -2.41, -0.80  | <b>&lt; 0.001</b> |
| Depression                      | -0.73  | -1.62, 0.16   | 0.107             |
| CAG                             | -1.16  | -1.40, -0.91  | <b>&lt; 0.001</b> |
| Age                             | -0.49  | -0.58, -0.41  | <b>&lt; 0.001</b> |
| Sex (female)                    | 0.35   | -0.90, 1.61   | 0.581             |

*Note.* Neuropsychiatric symptoms were measured using the Unified Huntington Disease Rating Scale (UHDRS). Numbers in bold indicate p-values < 0.05.

\*Interaction significant at p = 0.97. Separate time effects reported for different values of categorical variable.

<sup>1</sup>Random effect with mean 46.15 and SD = 2.75

<sup>2</sup>Random effect with mean -0.44 and SD = 0.46

<sup>3</sup>Random effect with mean -0.38 and SD = 0.46

<sup>4</sup>Random effect with mean 135.82 and SD = 9.04

<sup>5</sup>Random effect with mean -1.21 and SD = 0.74

<sup>6</sup>Random effect with mean 118.09 and SD = 10.90

<sup>7</sup>Random effect with mean -0.60 and SD = 0.60

<sup>8</sup>Random effect with mean 106.02 and SD = 9.03

<sup>9</sup>Random effect with mean -0.83 and SD = 0.59

**Table 3**

*Linear mixed models for measures of motor and behavioral symptoms*

| <b>Parameter</b>                 | <b>Estimate</b> | <b>95% CI</b>   | <b>Sig</b>        |
|----------------------------------|-----------------|-----------------|-------------------|
| <b>Motor Total</b>               |                 |                 |                   |
| Intercept <sup>1</sup>           | -92.92          | -110.91, -74.94 | <b>&lt; 0.001</b> |
| Time effect <sup>2</sup>         | 2.38            | 2.16, 2.59      | <b>&lt; 0.001</b> |
| Apathy                           | 1.44            | 0.35, 2.53      | <b>0.010</b>      |
| Depression                       | 0.44            | -0.76, 1.63     | 0.474             |
| CAG                              | 2.04            | 1.73, 2.34      | <b>&lt; 0.001</b> |
| Age                              | 0.57            | 0.46, 0.68      | <b>&lt; 0.001</b> |
| Sex (female)                     | 1.84            | 0.04, 3.63      | <b>0.045</b>      |
| Antipsychotic                    | 2.75            | 1.53, 3.96      | <b>&lt; 0.001</b> |
| Tetrabenazine                    | 1.52            | -0.42, 3.47     | 0.124             |
| <b>Neuropsychiatric Symptoms</b> |                 |                 |                   |
| Intercept <sup>3</sup>           | 0.06            | -11.48, 11.60   | 0.992             |
| Time effect <sup>4</sup>         | -0.25           | -0.38, -0.12    | <b>&lt; 0.001</b> |
| Apathy                           | 5.21            | 4.20, 6.21      | <b>&lt; 0.001</b> |
| Depression                       | 4.55            | 3.49, 5.61      | <b>&lt; 0.001</b> |
| CAG                              | 0.13            | -0.07, 0.32     | 0.209             |
| Age                              | -0.02           | -0.09, 0.05     | 0.656             |
| Sex (female)                     | 0.47            | -0.65, 1.58     | 0.411             |
| Antipsychotic                    | 2.19            | 1.16, 3.22      | <b>&lt; 0.001</b> |

*Note.* Movement disturbances and neuropsychiatric symptoms were measured using the Unified Huntington Disease Rating Scale (UHDRS). Numbers in bold indicate p-values < 0.05.

<sup>1</sup>Random effect with mean -92.92 and SD = 12.32

<sup>2</sup>Random effect with mean 2.38 and SD = 1.42

<sup>3</sup>Random effect with mean 0.06 and SD = 7.24

<sup>4</sup>Random effect with mean -0.25 and SD = 0.00

**Appendix 6: Baseline Apathy as a Predictor of Disease Course**

Apathy assessed as a continuous measure (score 0-16) at baseline; outcome measures assessed longitudinally across the study.

**Table 1**

*Linear mixed models for measures of function*

| <b>Parameter</b>                 | <b>Estimate</b> | <b>95% CI</b>  | <b>Sig</b>        |
|----------------------------------|-----------------|----------------|-------------------|
| <b>Independence Scale</b>        |                 |                |                   |
| Intercept <sup>1</sup>           | 169.23          | 153.79, 184.67 | <b>&lt; 0.001</b> |
| Time effect <sup>2</sup>         | -2.76           | -2.97, -2.56   | <b>&lt; 0.001</b> |
| Apathy                           | -1.09           | -1.42, -0.77   | <b>&lt; 0.001</b> |
| Apathy*Time                      | 0.09            | 0.04, 0.14     | <b>&lt; 0.001</b> |
| Depression                       | -0.12           | -0.40, 0.17    | 0.422             |
| CAG                              | -1.29           | -1.56, -1.03   | <b>&lt; 0.001</b> |
| Age                              | -0.37           | -0.46, -0.27   | <b>&lt; 0.001</b> |
| Sex (female)                     | -2.76           | -4.32, -1.20   | <b>0.001</b>      |
| <b>Total Functional Capacity</b> |                 |                |                   |
| Intercept <sup>3</sup>           | 26.84           | 23.50, 30.19   | <b>&lt; 0.001</b> |
| Time effect <sup>4</sup>         | -0.53           | -0.57, -0.49   | <b>&lt; 0.001</b> |
| Apathy                           | -0.24           | -0.31, -0.17   | <b>&lt; 0.001</b> |
| Apathy*Time                      | 0.02            | 0.01, 0.03     | <b>&lt; 0.001</b> |
| Depression                       | 0.00            | -0.06, 0.06    | 0.947             |
| CAG                              | -0.27           | -0.33, -0.22   | <b>&lt; 0.001</b> |
| Age                              | -0.07           | -0.10, -0.05   | <b>&lt; 0.001</b> |
| Sex (female)                     | -0.65           | -0.99, -0.31   | <b>&lt; 0.001</b> |

*Note.* Function and neuropsychiatric symptoms were measured using the Unified Huntington Disease Rating Scale (UHDRS). Numbers in bold indicate p-values < 0.05.

<sup>1</sup>Random effect with mean 169.23 and SD = 10.45

<sup>2</sup>Random effect with mean -2.76 and SD = 1.30



<sup>3</sup>*Random effect with mean 26.84 and SD = 2.38*

<sup>4</sup>*Random effect with mean -0.53 and SD = 0.23*

**Table 2**

*Linear mixed models for measures of cognition*

| <b>Parameter</b>                     | <b>Estimate</b> | <b>95% CI</b>  | <b>Sig</b> |
|--------------------------------------|-----------------|----------------|------------|
| <b>Mini-Mental State Examination</b> |                 |                |            |
| Intercept <sup>1</sup>               | 45.92           | 41.38, 50.46   | < 0.001    |
| Time effect <sup>2</sup>             | -0.44           | -0.50, -0.38   | < 0.001    |
| Apathy                               | -0.12           | -0.19, -0.05   | 0.001      |
| Depression                           | 0.02            | -0.06, 0.10    | 0.617      |
| CAG                                  | -0.32           | -0.40, -0.25   | < 0.001    |
| Age                                  | -0.08           | -0.11, -0.06   | < 0.001    |
| Sex (female)                         | -0.46           | -0.92, -0.01   | 0.045      |
| <b>Symbol Digits Modalities Test</b> |                 |                |            |
| Intercept <sup>3</sup>               | 134.70          | 120.07, 149.34 | < 0.001    |
| Time effect <sup>4</sup>             | -1.43           | -1.58, -1.28   | < 0.001    |
| Apathy                               | -0.47           | -0.74, -0.19   | 0.001      |
| Apathy*Time                          | 0.06            | 0.02, 0.10     | 0.005      |
| Depression                           | -0.04           | -0.28, 0.21    | 0.775      |
| CAG                                  | -1.76           | -2.02, -1.51   | < 0.001    |
| Age                                  | -0.53           | -0.61, -0.45   | < 0.001    |
| Sex (female)                         | 0.25            | -1.03, 1.53    | 0.702      |
| <b>Verbal Fluency</b>                |                 |                |            |
| Intercept <sup>5</sup>               | 118.07          | 101.46, 134.68 | < 0.001    |
| Time effect <sup>6</sup>             | -0.62           | -0.77, -0.48   | < 0.001    |
| Apathy                               | -0.39           | -0.63, -0.16   | 0.001      |
| Depression                           | 0.21            | -0.06, 0.48    | 0.120      |
| CAG                                  | -1.65           | -1.94, -1.36   | < 0.001    |
| Age                                  | -0.39           | -0.48, -0.30   | < 0.001    |

|                                 |        |               |                   |
|---------------------------------|--------|---------------|-------------------|
| Sex (female)                    | 0.09   | -1.38, 1.55   | 0.908             |
| <b>Stroop Interference Test</b> |        |               |                   |
| Intercept <sup>7</sup>          | 104.72 | 90.46, 118.99 | <b>&lt; 0.001</b> |
| Time effect <sup>8</sup>        | -1.07  | -1.23, -0.91  | <b>&lt; 0.001</b> |
| Apathy                          | -0.74  | -1.02, -0.45  | <b>&lt; 0.001</b> |
| Depression                      | 0.08   | 0.04, 0.12    | <b>&lt; 0.001</b> |
| CAG                             | -0.01  | -0.24, 0.22   | 0.933             |
| Age                             | -1.12  | -1.37, -0.88  | <b>&lt; 0.001</b> |
| Sex (female)                    | -0.49  | -0.57, -0.41  | <b>&lt; 0.001</b> |

---

Note. Neuropsychiatric symptoms were measured using the Unified Huntington Disease Rating Scale (UHDRS). Numbers in bold indicate p-values < 0.05.

<sup>1</sup>Random effect with mean 45.92 and SD = 0.69

<sup>2</sup>Random effect with mean -0.44 and SD = 0.06

<sup>3</sup>Random effect with mean 134.70 and SD = 9.03

<sup>4</sup>Random effect with mean -1.43 and SD = 0.75

<sup>5</sup>Random effect with mean 118.07 and SD = 10.89

<sup>6</sup>Random effect with mean -0.62 and SD = 0.61

<sup>7</sup>Random effect with mean 104.72 and SD = 8.98

<sup>8</sup>Random effect with mean -1.07 and SD = 0.59

**Table 3**

*Linear mixed models for measures of neuropsychiatric and motor symptoms*

| <b>Parameter</b>                 | <b>Estimate</b> | <b>95% CI</b>   | <b>Sig</b>        |
|----------------------------------|-----------------|-----------------|-------------------|
| <b>Motor Total</b>               |                 |                 |                   |
| Intercept <sup>1</sup>           | -91.48          | -109.45, -73.51 | <b>&lt; 0.001</b> |
| Time effect <sup>2</sup>         | 2.47            | 2.26, 2.68      | <b>&lt; 0.001</b> |
| Apathy                           | 0.17            | -0.12, 0.46     | 0.262             |
| Depression                       | 0.12            | -0.21, 0.44     | 0.485             |
| CAG                              | 2.02            | 1.71, 2.32      | <b>&lt; 0.001</b> |
| Age                              | 0.56            | 0.45, 0.67      | <b>&lt; 0.001</b> |
| Sex (female)                     | 1.84            | 0.03, 3.66      | <b>0.047</b>      |
| Antipsychotic                    | 2.74            | 1.52, 3.96      | <b>&lt; 0.001</b> |
| Tetrabenazine                    | 1.59            | -0.35, 3.53     | 0.109             |
| <b>Neuropsychiatric Symptoms</b> |                 |                 |                   |
| Intercept <sup>3</sup>           | 5.89            | -5.40, 17.18    | 0.306             |
| Time effect <sup>4</sup>         | 0.13            | -0.02, 0.28     | 0.092             |
| Apathy                           | 0.84            | 0.57, 1.11      | <b>&lt; 0.001</b> |
| Apathy*Time                      | -0.07           | -0.11, -0.04    | <b>&lt; 0.001</b> |
| Depression                       | 1.18            | 0.98, 1.39      | <b>&lt; 0.001</b> |
| CAG                              | 0.04            | -0.15, 0.23     | 0.676             |
| Age                              | -0.04           | -0.10, 0.03     | 0.309             |
| Sex (female)                     | 0.30            | -0.81, 1.40     | 0.600             |
| Antipsychotic                    | 2.08            | 1.04, 3.11      | <b>&lt; 0.001</b> |

*Note.* Movement disturbances and neuropsychiatric symptoms were measured using the Unified Huntington Disease Rating Scale (UHDRS). Numbers in bold indicate p-values < 0.05.

<sup>1</sup>Random effect with mean -91.48 and SD = 12.35

<sup>2</sup>Random effect with mean 2.47 and SD = 1.43

<sup>3</sup>Random effect with mean 5.89 and SD = 6.93

<sup>4</sup>Random effect with mean 0.13 and SD = 0.22
